# Supplementary material
Source: PubMed Central journal article supplement (PMC6783805)
Supplement: NIHMS1043025-supplement-1.pdf [file NIHMS1043025-supplement-1.pdf]

1 Supplementary Table 1: Average admissions and patients days at both hospitals before  
2 and after the policy change.

|                              |            | <b>Before</b> | <b>After</b> |
|------------------------------|------------|---------------|--------------|
| Average Monthly Admissions   | Hospital A | 1,534         | 1,707        |
|                              | Hospital B | 1,414         | 1,356        |
| Average Monthly Patient Days | Hospital A | 11,560        | 11,901       |
|                              | Hospital B | 5,901         | 5,873        |

3

4 Hospital A = Ronald Reagan UCLA Medical Center

5 Hospital B = Santa Monica UCLA Medical Center

6 Before = Before contact precautions were discontinued at each site.

7 After = After contact precautions were discontinued at each site.

---

8

9

10

11

12

13

14

15

16

17

18

19

20

21

22 Supplementary Table 2: Comparison of hospital outcomes before and after the contact  
23 precautions policy change.

|                            |            | <b>Before</b> | <b>After</b> | <b>P-value</b> |
|----------------------------|------------|---------------|--------------|----------------|
| 30-day<br>Readmission Rate | Hospital A | 2.5%          | 2.4%         | 0.49           |
|                            | Hospital B | 1.6%          | 1.5%         | 0.43           |
| In-hospital<br>Mortality   | Hospital A | 5.3%          | 5.3%         | 0.87           |
|                            | Hospital B | 3.7%          | 3.6%         | 0.63           |

24  
25 Hospital A = Ronald Reagan UCLA Medical Center

26 Hospital B = Santa Monica UCLA Medical Center

27 Before = Before contact precautions were discontinued at each site.

28 After = After contact precautions were discontinued at each site.

29

30
